# Supplementary material
Source: HighWire-hosted journal article supplement (https://bmjopen.bmj.com/content/11/12/e052146)
Supplement: inline-supplementary-material-1 [file inline-supplementary-material-1.pdf]

*Appendix A. Selection Criteria for Identifying Medicare Beneficiaries Diagnosed with Hormone Receptor-Positive Early Stage Breast Cancer from 2007 to Mid-2009*

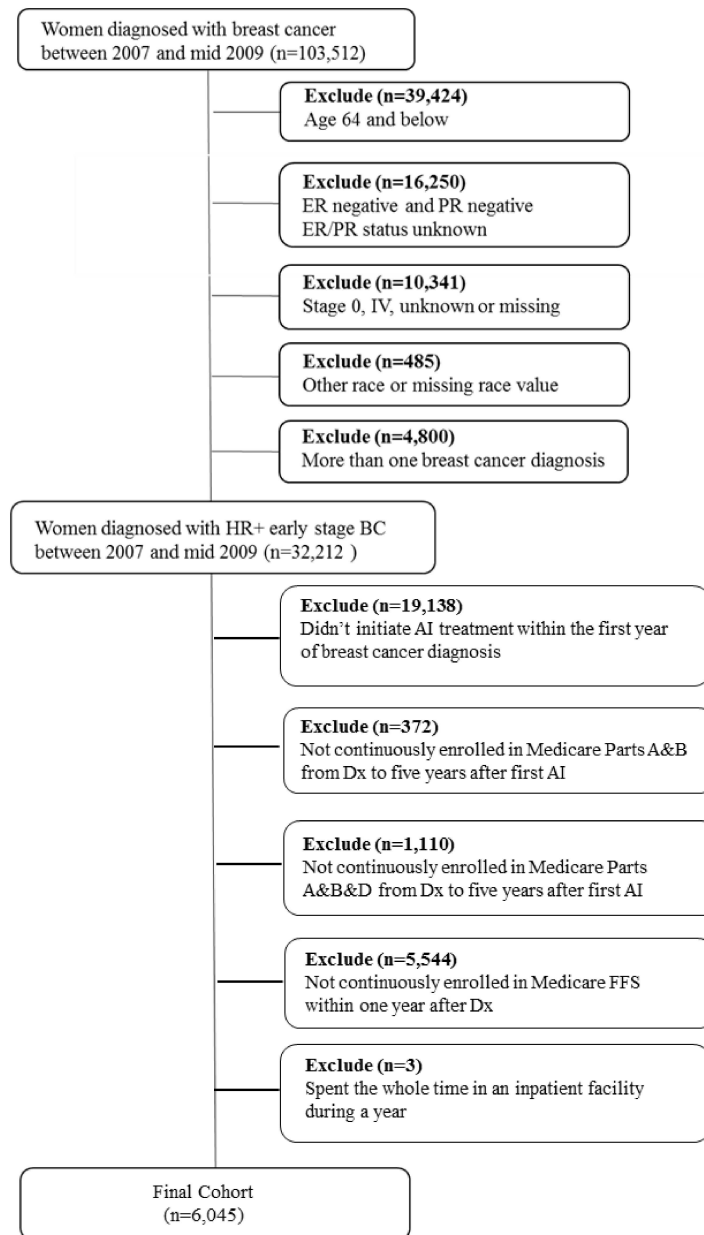

*Appendix B. Descriptions of Variables*

| VARIABLE NAME                       | DEFINITION                                                                                                                                 |
|-------------------------------------|--------------------------------------------------------------------------------------------------------------------------------------------|
| <b>DEPENDENT VARIABLES</b>          |                                                                                                                                            |
| <i>Healthcare utilization</i>       |                                                                                                                                            |
| Any hospitalization                 | A dummy variable equal to 1 if at least one hospitalization                                                                                |
| Inpatient visits                    | A continuous variable of number of hospitalizations                                                                                        |
| Length of stay                      | A continuous variable of number of days in hospital                                                                                        |
| Any outpatient visits               | A dummy variable equal to 1 if at least one outpatient visits                                                                              |
| Outpatient visits                   | A continuous variable of number of outpatient visits                                                                                       |
| <i>Healthcare costs</i>             |                                                                                                                                            |
| Total healthcare costs              | A continuous variable measures the sum of non-drug medical costs and prescription drug costs                                               |
| Non-drug medical costs              | A continuous variable measures the sum of inpatient and outpatient costs                                                                   |
| Inpatient costs                     | A subgroup of total medical costs                                                                                                          |
| Outpatient costs                    | A subgroup of total medical costs                                                                                                          |
| Prescription drug costs             | A continuous variable                                                                                                                      |
| <b>TREATMENT VARIABLES</b>          |                                                                                                                                            |
| Adherence continuous                | A continuous variable of MPR %                                                                                                             |
| Adherence dummy                     | A dummy equal to 1 if MPR $\geq 80\%$                                                                                                      |
| <b>CONTROL VARIABLES</b>            |                                                                                                                                            |
| Race/Ethnicity                      | A dummy variable equal to 1 if White, non-Hispanic                                                                                         |
| Age continuous                      | A continuous variable, 65+ years old                                                                                                       |
| Married                             | A dummy variable equal to 1 if married                                                                                                     |
| Tumor Stage                         | A categorical variable where<br>1 Stage I<br>2 Stage II<br>3 Stage III                                                                     |
| Initial Surgery/Radiation Treatment | A categorical variable where<br>1 No surgery<br>2 Surgery (breast-conserving surgery or mastectomy) + radiation<br>3 Surgery, no radiation |

|                                                                                                                                                    |                              |
|----------------------------------------------------------------------------------------------------------------------------------------------------|------------------------------|
| HCC Risk Score                                                                                                                                     | A categorical variable where |
| (see detailed construction description on NCI                                                                                                      | 1 0                          |
| website: <a href="https://healthcaaredelivery.cancer.gov/seermedicare/considerations/comorbidity.html">https://healthcaaredelivery.cancer.gov/</a> | 2 1                          |
| seermedicare/considerations/comorbidity.html)                                                                                                      | 3 2                          |
|                                                                                                                                                    | 4 3+                         |

*Appendix C. Association between Medication Possession Ratio and Healthcare Utilization and Costs among Medicare Beneficiaries with Breast Cancer over the Full Course of Treatment, controlling for covariates*

*C-1. No. of Hospitalization*

| <b>Variables</b>       | <b>Estimates</b> | <b>SE</b> | <b>P</b> | <b>95% CI</b> |        |
|------------------------|------------------|-----------|----------|---------------|--------|
| MPR                    | -0.083           | 0.013     | ***      | -0.108        | -0.058 |
| Year                   |                  |           |          |               |        |
| 2 vs 1                 | -0.132           | 0.018     | ***      | -0.167        | -0.096 |
| 3 vs 1                 | -0.108           | 0.019     | ***      | -0.144        | -0.071 |
| 4 vs 1                 | 0.033            | 0.021     | NS       | -0.008        | 0.075  |
| 5 vs 1                 | 0.066            | 0.022     | **       | 0.022         | 0.109  |
| HCC Score              |                  |           |          |               |        |
| 1 vs 0                 | 0.114            | 0.014     | ***      | 0.088         | 0.141  |
| 2 vs 0                 | 0.255            | 0.022     | ***      | 0.211         | 0.299  |
| 3+ vs 0                | 0.599            | 0.033     | ***      | 0.535         | 0.664  |
| Married                |                  |           |          |               |        |
| Yes vs No              | -0.098           | 0.013     | ***      | -0.123        | -0.074 |
| Treatment              |                  |           |          |               |        |
| No surgery vs          |                  |           | ***      |               |        |
| Surgery + radiation    | 0.077            | 0.013     |          | 0.052         | 0.102  |
| Surgery, no radiation  |                  |           | ***      |               |        |
| vs Surgery + radiation | 0.304            | 0.056     |          | 0.194         | 0.414  |
| Race                   |                  |           |          |               |        |
| Asian vs White         | -0.182           | 0.023     | ***      | -0.226        | -0.138 |
| Black vs White         | 0.023            | 0.025     | NS       | -0.026        | 0.073  |
| Hispanic vs White      | -0.046           | 0.024     | NS       | -0.094        | 0.001  |
| Stage                  |                  |           |          |               |        |
| II vs I                | 0.059            | 0.013     | ***      | 0.033         | 0.090  |
| III vs I               | 0.152            | 0.024     | ***      | 0.104         | 0.200  |
| Age                    | 0.010            | 0.001     | ***      | 0.008         | 0.011  |

Note: \*statistically significant at  $P < 0.05$  level, \*\* at  $P < 0.01$  level, \*\*\* at  $P < 0.001$  level; NS stands for not significant

## C-2. LOS

| Variables              | Estimates | SE    | P   | 95% CI |        |
|------------------------|-----------|-------|-----|--------|--------|
| MPR                    | -0.701    | 0.309 | *   | -1.305 | -0.096 |
| Year                   |           |       |     |        |        |
| 2 vs 1                 | -1.403    | 0.328 | *** | -2.047 | -0.759 |
| 3 vs 1                 | -0.882    | 0.370 | *   | -1.607 | -0.157 |
| 4 vs 1                 | 0.949     | 0.438 | *   | 0.091  | 1.808  |
| 5 vs 1                 | 0.724     | 0.383 | NS  | -0.026 | 1.475  |
| HCC Score              |           |       |     |        |        |
| 1 vs 0                 | 1.490     | 0.247 | *** | 1.006  | 1.974  |
| 2 vs 0                 | 3.102     | 0.381 | *** | 2.354  | 3.849  |
| 3+ vs 0                | 8.179     | 0.628 | *** | 6.949  | 9.409  |
| Married                |           |       |     |        |        |
| Yes vs No              | -2.036    | 0.215 | *** | -2.458 | -1.614 |
| Treatment              |           |       |     |        |        |
| No surgery vs          |           |       | *** |        |        |
| Surgery + radiation    | 1.322     | 0.237 |     | 0.858  | 1.787  |
| Surgery, no radiation  |           |       | *** |        |        |
| vs Surgery + radiation | 4.842     | 1.198 |     | 2.494  | 7.189  |
| Race                   |           |       |     |        |        |
| Asian vs White         | -2.255    | 0.390 | *** | -3.019 | -1.491 |
| Black vs White         | 0.840     | 0.567 | NS  | -0.271 | 1.951  |
| Hispanic vs White      | -0.851    | 0.424 | *   | -1.683 | -0.020 |
| Stage                  |           |       |     |        |        |
| II vs I                | 1.070     | 0.246 | *** | 0.588  | 1.552  |
| III vs I               | 2.248     | 0.524 | *** | 1.221  | 3.275  |
| Age                    | 0.190     | 0.020 | *** | 0.151  | 0.229  |

Note: \*statistically significant at  $P < 0.05$  level, \*\* at  $P < 0.01$  level, \*\*\* at  $P < 0.001$  level; NS stands for not significant

*C-3. No. of Outpatient Visits*

| <b>Variables</b>       | <b>Estimates</b> | <b>SE</b> | <b>P</b> | <b>95% CI</b> |        |
|------------------------|------------------|-----------|----------|---------------|--------|
| MPR                    | -0.230           | 0.103     | *        | -0.431        | -0.029 |
| Year                   |                  |           |          |               |        |
| 2 vs 1                 | -1.370           | 0.132     | ***      | -1.628        | -1.112 |
| 3 vs 1                 | -1.620           | 0.132     | ***      | -1.878        | -1.361 |
| 4 vs 1                 | -1.844           | 0.132     | ***      | -2.103        | -1.585 |
| 5 vs 1                 | -1.752           | 0.137     | ***      | -2.020        | -1.485 |
| HCC Score              |                  |           |          |               |        |
| 1 vs 0                 | 0.757            | 0.093     | ***      | 0.575         | 0.940  |
| 2 vs 0                 | 1.651            | 0.143     | ***      | 1.371         | 1.930  |
| 3+ vs 0                | 3.277            | 0.187     | ***      | 2.911         | 3.643  |
| Married                |                  |           |          |               |        |
| Yes vs No              | -0.246           | 0.082     | **       | -0.406        | -0.085 |
| Treatment              |                  |           |          |               |        |
| No surgery vs          |                  |           |          |               |        |
| Surgery + radiation    | -0.463           | 0.082     | ***      | -0.623        | -0.303 |
| Surgery, no radiation  |                  |           |          |               |        |
| vs Surgery + radiation | -0.522           | 0.266     | NS       | -1.044        | -0.001 |
| Race                   |                  |           |          |               |        |
| Asian vs White         | -1.212           | 0.166     | ***      | -1.537        | -0.886 |
| Black vs White         | 1.080            | 0.195     | ***      | 0.697         | 1.463  |
| Hispanic vs White      | 0.216            | 0.180     | NS       | -0.138        | 0.570  |
| Stage                  |                  |           |          |               |        |
| II vs I                | 0.847            | 0.087     | ***      | 0.676         | 1.018  |
| III vs I               | 1.276            | 0.157     | ***      | 0.968         | 1.583  |
| Age                    | -0.059           | 0.006     | ***      | -0.072        | -0.046 |

Note: \*statistically significant at  $P < 0.05$  level, \*\* at  $P < 0.01$  level, \*\*\* at  $P < 0.001$  level; NS stands for not significant

*C-4. No. of Physician Office Visits*

| <b>Variables</b>       | <b>Estimates</b> | <b>SE</b> | <b>P</b> | <b>95% CI</b> |        |
|------------------------|------------------|-----------|----------|---------------|--------|
| MPR                    | -1.233           | 0.257     | ***      | -1.736        | -0.729 |
| Year                   |                  |           |          |               |        |
| 2 vs 1                 | -4.469           | 0.327     | ***      | -5.110        | -3.829 |
| 3 vs 1                 | -5.454           | 0.326     | ***      | -6.093        | -4.815 |
| 4 vs 1                 | -5.773           | 0.329     | ***      | -6.419        | -5.128 |
| 5 vs 1                 | -6.128           | 0.337     | ***      | -6.788        | -5.468 |
| HCC Score              |                  |           |          |               |        |
| 1 vs 0                 | 3.756            | 0.235     | ***      | 3.294         | 4.217  |
| 2 vs 0                 | 7.022            | 0.360     | ***      | 6.316         | 7.728  |
| 3+ vs 0                | 14.854           | 0.487     | ***      | 13.900        | 15.808 |
| Married                |                  |           |          |               |        |
| Yes vs No              | 0.040            | 0.207     | NS       | -0.366        | 0.446  |
| Treatment              |                  |           |          |               |        |
| No surgery vs          |                  |           |          |               |        |
| Surgery + radiation    | -1.893           | 0.204     | ***      | -2.293        | -1.493 |
| Surgery, no radiation  |                  |           |          |               |        |
| vs Surgery + radiation | -1.230           | 0.680     | NS       | -2.563        | 0.104  |
| Race                   |                  |           |          |               |        |
| Asian vs White         | -2.075           | 0.448     | ***      | -2.954        | -1.196 |
| Black vs White         | -1.614           | 0.408     | ***      | -2.415        | -0.814 |
| Hispanic vs White      | -0.506           | 0.431     | NS       | -1.352        | 0.339  |
| Stage                  |                  |           |          |               |        |
| II vs I                | 0.654            | 0.215     | **       | 0.232         | 1.076  |
| III vs I               | 0.334            | 0.356     | NS       | -0.364        | 1.032  |
| Age                    | 0.014            | 0.016     | NS       | -0.018        | 0.046  |

Note: \*statistically significant at  $P < 0.05$  level, \*\* at  $P < 0.01$  level, \*\*\* at  $P < 0.001$  level; NS stands for not significant

*C-5. Total Healthcare Costs*

| <b>Variables</b>       | <b>Estimates</b> | <b>SE</b> | <b>P</b> | <b>95% CI</b> |        |
|------------------------|------------------|-----------|----------|---------------|--------|
| MPR                    | 579              | 358       | NS       | -123          | 1,282  |
| Year                   |                  |           |          |               |        |
| 2 vs 1                 | -6,919           | 365       | ***      | -7,633        | -6,205 |
| 3 vs 1                 | -7,389           | 400       | ***      | -8,173        | -6,605 |
| 4 vs 1                 | -7,127           | 428       | ***      | -7,967        | -6,288 |
| 5 vs 1                 | -9,523           | 432       | ***      | -10,369       | -8,676 |
| HCC Score              |                  |           |          |               |        |
| 1 vs 0                 | 3,668            | 296       | ***      | 3,087         | 4,249  |
| 2 vs 0                 | 7,373            | 461       | ***      | 6,469         | 8,277  |
| 3+ vs 0                | 17,036           | 748       | ***      | 15,571        | 18,501 |
| Married                |                  |           |          |               |        |
| Yes vs No              | -1,637           | 264       | ***      | -2,155        | -1,120 |
| Treatment              |                  |           |          |               |        |
| No surgery vs          |                  |           |          |               |        |
| Surgery + radiation    | 276              | 270       | NS       | -253          | 804    |
| Surgery, no radiation  |                  |           |          |               |        |
| vs Surgery + radiation | 2,108            | 906       | *        | 333           | 3,884  |
| Race                   |                  |           |          |               |        |
| Asian vs White         | -200             | 594       | NS       | -1,364        | 965    |
| Black vs White         | 1,837            | 636       | **       | 592           | 3,083  |
| Hispanic vs White      | 1,588            | 592       | **       | 427           | 2,749  |
| Stage                  |                  |           |          |               |        |
| II vs I                | 1,832            | 280       | ***      | 1,283         | 2,380  |
| III vs I               | 3,687            | 500       | ***      | 2,707         | 4,667  |
| Age                    | 26               | 21        | NS       | -15           | 68     |

Note: \*statistically significant at  $P < 0.05$  level, \*\* at  $P < 0.01$  level, \*\*\* at  $P < 0.001$  level; NS stands for not significant

*C-6. Total Non-drug Medical Costs*

| <b>Variables</b>       | <b>Estimates</b> | <b>SE</b> | <b>P</b> | <b>95% CI</b> |        |
|------------------------|------------------|-----------|----------|---------------|--------|
| MPR                    | -2,716           | 322       | ***      | -3,347        | -2,086 |
| Year                   |                  |           |          |               |        |
| 2 vs 1                 | -6,404           | 362       | ***      | -7,114        | -5,695 |
| 3 vs 1                 | -5,964           | 391       | ***      | -6,731        | -5,196 |
| 4 vs 1                 | -4,681           | 420       | ***      | -5,504        | -3,858 |
| 5 vs 1                 | -6,363           | 418       | ***      | -7,183        | -5,543 |
| HCC Score              |                  |           |          |               |        |
| 1 vs 0                 | 2,298            | 274       | ***      | 1,761         | 2,836  |
| 2 vs 0                 | 5,107            | 432       | ***      | 4,260         | 5,955  |
| 3+ vs 0                | 13,098           | 708       | ***      | 11,711        | 14,485 |
| Married                |                  |           |          |               |        |
| Yes vs No              | -1,115           | 245       | ***      | -1,596        | -634   |
| Treatment              |                  |           |          |               |        |
| No surgery vs          |                  |           |          |               |        |
| Surgery + radiation    | -216             | 249       | NS       | -703          | 272    |
| Surgery, no radiation  |                  |           |          |               |        |
| vs Surgery + radiation | 2,306            | 869       | **       | 604           | 4,009  |
| Race                   |                  |           |          |               |        |
| Asian vs White         | -1,633           | 553       | **       | -2,717        | -549   |
| Black vs White         | 1,277            | 591       | *        | 119           | 2,435  |
| Hispanic vs White      | 1,328            | 568       | *        | 215           | 2,441  |
| Stage                  |                  |           |          |               |        |
| II vs I                | 1,489            | 258       | ***      | 984           | 1,995  |
| III vs I               | 3,670            | 477       | ***      | 2,736         | 4,603  |
| Age                    | 51               | 20        | *        | 12            | 89     |

Note: \*statistically significant at  $P < 0.05$  level, \*\* at  $P < 0.01$  level, \*\*\* at  $P < 0.001$  level; NS stands for not significant

*C-7. Medication Costs*

| <b>Variables</b>       | <b>Estimates</b> | <b>SE</b> | <b>P</b> | <b>95% CI</b> |        |
|------------------------|------------------|-----------|----------|---------------|--------|
| MPR                    | 3,637            | 101       | ***      | 3,440         | 3,834  |
| Year                   |                  |           |          |               |        |
| 2 vs 1                 | -767             | 91        | ***      | -946          | -589   |
| 3 vs 1                 | -1,589           | 98        | ***      | -1,782        | -1,396 |
| 4 vs 1                 | -2,514           | 100       | ***      | -2,711        | -2,317 |
| 5 vs 1                 | -3,221           | 105       | ***      | -3,427        | -3,016 |
| HCC Score              |                  |           |          |               |        |
| 1 vs 0                 | 1,476            | 81        | ***      | 1,317         | 1,635  |
| 2 vs 0                 | 2,428            | 128       | ***      | 2,178         | 2,678  |
| 3+ vs 0                | 4,270            | 184       | ***      | 3,909         | 4,631  |
| Married                |                  |           |          |               |        |
| Yes vs No              | -505             | 68        | ***      | -639          | -371   |
| Treatment              |                  |           |          |               |        |
| No surgery vs          |                  |           |          |               |        |
| Surgery + radiation    | 553              | 74        | ***      | 408           | 697    |
| Surgery, no radiation  |                  |           |          |               |        |
| vs Surgery + radiation | -109             | 214       | NS       | -528          | 310    |
| Race                   |                  |           |          |               |        |
| Asian vs White         | 1,444            | 194       | ***      | 1,063         | 1,825  |
| Black vs White         | 378              | 141       | **       | 102           | 653    |
| Hispanic vs White      | 286              | 124       | *        | 44            | 528    |
| Stage                  |                  |           |          |               |        |
| II vs I                | 209              | 73        | **       | 65            | 353    |
| III vs I               | -84              | 117       | NS       | -314          | 145    |
| Age                    | -28              | 5         | ***      | -38           | -18    |

Note: \*statistically significant at  $P < 0.05$  level, \*\* at  $P < 0.01$  level, \*\*\* at  $P < 0.001$  level; NS stands for not significant

*Appendix D. Association between Adherent and Nonadherent Breast Cancer Patients with Medicare Coverage and Healthcare Utilization and Costs over the Full Course of Treatment*

*D-1. No. of Hospitalization*

| <b>Variables</b>       | <b>Estimates</b> | <b>SE</b> | <b>P</b> | <b>95% CI</b> |        |
|------------------------|------------------|-----------|----------|---------------|--------|
| Adherent (Yes vs No)   | -0.083           | 0.013     | ***      | -0.108        | -0.058 |
| Year                   |                  |           |          |               |        |
| 2 vs 1                 | -0.131           | 0.018     | ***      | -0.166        | -0.096 |
| 3 vs 1                 | -0.105           | 0.019     | ***      | -0.142        | -0.069 |
| 4 vs 1                 | 0.034            | 0.021     | NS       | -0.007        | 0.075  |
| 5 vs 1                 | 0.062            | 0.022     | **       | 0.019         | 0.105  |
| HCC Score              |                  |           |          |               |        |
| 1 vs 0                 | 0.115            | 0.014     | ***      | 0.089         | 0.142  |
| 2 vs 0                 | 0.256            | 0.023     | ***      | 0.212         | 0.301  |
| 3+ vs 0                | 0.583            | 0.033     | ***      | 0.518         | 0.649  |
| Married                |                  |           |          |               |        |
| Yes vs No              | -0.096           | 0.013     | ***      | -0.120        | -0.071 |
| Treatment              |                  |           |          |               |        |
| No surgery vs          |                  |           | ***      |               |        |
| Surgery + radiation    | 0.072            | 0.013     |          | 0.047         | 0.097  |
| Surgery, no radiation  |                  |           | ***      |               |        |
| vs Surgery + radiation | 0.284            | 0.056     |          | 0.174         | 0.394  |
| Race                   |                  |           |          |               |        |
| Asian vs White         | -0.167           | 0.022     | ***      | -0.211        | -0.123 |
| Black vs White         | 0.018            | 0.025     | NS       | -0.030        | 0.067  |
| Hispanic vs White      | -0.022           | 0.025     | NS       | -0.072        | 0.027  |
| Stage                  |                  |           |          |               |        |
| II vs I                | 0.063            | 0.013     | ***      | 0.037         | 0.089  |
| III vs I               | 0.133            | 0.024     | ***      | 0.087         | 0.180  |
| Age                    | 0.009            | 0.001     | ***      | 0.007         | 0.011  |

Note: \*statistically significant at  $P < 0.05$  level, \*\* at  $P < 0.01$  level, \*\*\* at  $P < 0.001$  level; NS stands for not significant

*D-2. LOS*

| <b>Variables</b>       | <b>Estimates</b> | <b>SE</b> | <b>P</b> | <b>95% CI</b> |        |
|------------------------|------------------|-----------|----------|---------------|--------|
| Adherent (Yes vs No)   | -0.607           | 0.215     | **       | -1.028        | -0.187 |
| Year                   |                  |           |          |               |        |
| 2 vs 1                 | -1.378           | 0.294     | ***      | -1.953        | -0.803 |
| 3 vs 1                 | -0.841           | 0.316     | **       | -1.460        | -0.221 |
| 4 vs 1                 | 1.018            | 0.376     | **       | 0.281         | 1.755  |
| 5 vs 1                 | 0.751            | 0.362     | *        | 0.042         | 1.460  |
| HCC Score              |                  |           |          |               |        |
| 1 vs 0                 | 1.495            | 0.214     | ***      | 1.076         | 1.914  |
| 2 vs 0                 | 3.109            | 0.368     | ***      | 2.388         | 3.831  |
| 3+ vs 0                | 8.199            | 0.645     | ***      | 6.936         | 9.463  |
| Married                |                  |           |          |               |        |
| Yes vs No              | -2.046           | 0.199     | ***      | -2.436        | -1.656 |
| Treatment              |                  |           |          |               |        |
| No surgery vs          |                  |           | ***      |               |        |
| Surgery + radiation    | 1.331            | 0.211     |          | 0.917         | 1.746  |
| Surgery, no radiation  |                  |           | ***      |               |        |
| vs Surgery + radiation | 4.816            | 1.135     |          | 2.591         | 7.040  |
| Race                   |                  |           |          |               |        |
| Asian vs White         | -2.255           | 0.329     | ***      | -2.899        | -1.611 |
| Black vs White         | 0.848            | 0.495     | NS       | -0.122        | 1.818  |
| Hispanic vs White      | -0.846           | 0.369     | *        | -1.570        | -0.123 |
| Stage                  |                  |           |          |               |        |
| II vs I                | 1.067            | 0.228     | ***      | 0.621         | 1.514  |
| III vs I               | 2.253            | 0.451     | ***      | 1.368         | 3.137  |
| Age                    | 0.191            | 0.019     | ***      | 0.154         | 0.227  |

Note: \*statistically significant at  $P < 0.05$  level, \*\* at  $P < 0.01$  level, \*\*\* at  $P < 0.001$  level; NS stands for not significant

*D-3. No. of Outpatient Visits*

| <b>Variables</b>       | <b>Estimates</b> | <b>SE</b> | <b>P</b> | <b>95% CI</b> |        |
|------------------------|------------------|-----------|----------|---------------|--------|
| Adherent (Yes vs No)   | -0.141           | 0.080     | NS       | -0.298        | 0.015  |
| Year                   |                  |           |          |               |        |
| 2 vs 1                 | -1.351           | 0.130     | ***      | -1.607        | -1.096 |
| 3 vs 1                 | -1.599           | 0.130     | ***      | -1.854        | -1.343 |
| 4 vs 1                 | -1.825           | 0.130     | ***      | -2.080        | -1.570 |
| 5 vs 1                 | -1.733           | 0.135     | ***      | -1.997        | -1.469 |
| HCC Score              |                  |           |          |               |        |
| 1 vs 0                 | 0.756            | 0.093     | ***      | 0.573         | 0.939  |
| 2 vs 0                 | 1.651            | 0.143     | ***      | 1.371         | 1.932  |
| 3+ vs 0                | 3.271            | 0.187     | ***      | 2.904         | 3.637  |
| Married                |                  |           |          |               |        |
| Yes vs No              | -0.252           | 0.082     | **       | -0.413        | -0.091 |
| Treatment              |                  |           |          |               |        |
| No surgery vs          |                  |           |          |               |        |
| Surgery + radiation    | -0.464           | 0.082     | ***      | -0.624        | -0.304 |
| Surgery, no radiation  |                  |           |          |               |        |
| vs Surgery + radiation | -0.538           | 0.265     | *        | -1.058        | -0.018 |
| Race                   |                  |           |          |               |        |
| Asian vs White         | -1.176           | 0.166     | ***      | -1.500        | -0.851 |
| Black vs White         | 1.079            | 0.195     | ***      | 0.696         | 1.462  |
| Hispanic vs White      | 0.204            | 0.181     | NS       | -0.151        | 0.559  |
| Stage                  |                  |           |          |               |        |
| II vs I                | 0.847            | 0.087     | ***      | 0.677         | 1.018  |
| III vs I               | 1.277            | 0.157     | ***      | 0.969         | 1.584  |
| Age                    | -0.059           | 0.006     | ***      | -0.071        | -0.046 |

Note: \*statistically significant at  $P < 0.05$  level, \*\* at  $P < 0.01$  level, \*\*\* at  $P < 0.001$  level; NS stands for not significant

*D-4. No. of Physician Office Visits*

| <b>Variables</b>       | <b>Estimates</b> | <b>SE</b> | <b>P</b> | <b>95% CI</b> |        |
|------------------------|------------------|-----------|----------|---------------|--------|
| Adherent (Yes vs No)   | -1.116           | 0.200     | ***      | -1.507        | -0.724 |
| Year                   |                  |           |          |               |        |
| 2 vs 1                 | -4.432           | 0.325     | ***      | -5.068        | -3.795 |
| 3 vs 1                 | -5.382           | 0.324     | ***      | -6.016        | -4.748 |
| 4 vs 1                 | -5.679           | 0.327     | ***      | -6.319        | -5.039 |
| 5 vs 1                 | -6.090           | 0.333     | ***      | -6.743        | -5.436 |
| HCC Score              |                  |           |          |               |        |
| 1 vs 0                 | 3.762            | 0.235     | ***      | 3.301         | 4.224  |
| 2 vs 0                 | 7.038            | 0.360     | ***      | 6.332         | 7.745  |
| 3+ vs 0                | 14.873           | 0.487     | ***      | 13.918        | 15.827 |
| Married                |                  |           |          |               |        |
| Yes vs No              | 0.024            | 0.207     | NS       | -0.383        | 0.430  |
| Treatment              |                  |           |          |               |        |
| No surgery vs          |                  |           |          |               |        |
| Surgery + radiation    | -1.884           | 0.204     | ***      | -2.285        | -1.484 |
| Surgery, no radiation  |                  |           |          |               |        |
| vs Surgery + radiation | -1.258           | 0.679     | NS       | -2.589        | 0.074  |
| Race                   |                  |           |          |               |        |
| Asian vs White         | -2.069           | 0.448     | ***      | -2.947        | -1.190 |
| Black vs White         | -1.605           | 0.408     | ***      | -2.405        | -0.805 |
| Hispanic vs White      | -0.488           | 0.432     | NS       | -1.334        | 0.358  |
| Stage                  |                  |           |          |               |        |
| II vs I                | 0.651            | 0.215     | **       | 0.229         | 1.072  |
| III vs I               | 0.345            | 0.356     | NS       | -0.354        | 1.044  |
| Age                    | 0.015            | 0.016     | NS       | -0.017        | 0.046  |

*D-5. Total Healthcare Costs*

| <b>Variables</b>       | <b>Estimates</b> | <b>SE</b> | <b>P</b> | <b>95% CI</b> |        |
|------------------------|------------------|-----------|----------|---------------|--------|
| Adherent (Yes vs No)   | 146              | 263       | NS       | -369          | 661    |
| Year                   |                  |           |          |               |        |
| 2 vs 1                 | -7,009           | 363       | ***      | -7,720        | -6,298 |
| 3 vs 1                 | -7,494           | 397       | ***      | -8,271        | -6,717 |
| 4 vs 1                 | -7,245           | 423       | ***      | -8,074        | -6,416 |
| 5 vs 1                 | -9,660           | 428       | ***      | -10,499       | -8,821 |
| HCC Score              |                  |           |          |               |        |
| 1 vs 0                 | 3,672            | 296       | ***      | 3,091         | 4,253  |
| 2 vs 0                 | 7,388            | 462       | ***      | 6,482         | 8,293  |
| 3+ vs 0                | 17,052           | 747       | ***      | 15,588        | 18,517 |
| Married                |                  |           |          |               |        |
| Yes vs No              | -1,643           | 264       | ***      | -2,160        | -1,126 |
| Treatment              |                  |           |          |               |        |
| No surgery vs          |                  |           |          |               |        |
| Surgery + radiation    | 269              | 269       | NS       | -259          | 797    |
| Surgery, no radiation  |                  |           |          |               |        |
| vs Surgery + radiation | 2,089            | 904       | *        | 318           | 3,861  |
| Race                   |                  |           |          |               |        |
| Asian vs White         | -158             | 597       | NS       | -1,329        | 1,013  |
| Black vs White         | 1,867            | 635       | **       | 621           | 3,112  |
| Hispanic vs White      | 1,600            | 591       | **       | 441           | 2,759  |
| Stage                  |                  |           |          |               |        |
| II vs I                | 1,846            | 279       | ***      | 1,298         | 2,394  |
| III vs I               | 3,677            | 499       | ***      | 2,700         | 4,655  |
| Age                    | 25               | 21        | NS       | -16           | 66     |

Note: \*statistically significant at  $P < 0.05$  level, \*\* at  $P < 0.01$  level, \*\*\* at  $P < 0.001$  level; NS stands for not significant

*D-6. Total Non-drug Medical Costs*

| <b>Variables</b>       | <b>Estimates</b> | <b>SE</b> | <b>P</b> | <b>95% CI</b> |        |
|------------------------|------------------|-----------|----------|---------------|--------|
| Adherent (Yes vs No)   | -2,243           | 250       | ***      | -2,733        | -1,753 |
| Year                   |                  |           |          |               |        |
| 2 vs 1                 | -6,257           | 355       | ***      | -6,953        | -5,562 |
| 3 vs 1                 | -5,760           | 383       | ***      | -6,511        | -5,010 |
| 4 vs 1                 | -4,448           | 410       | ***      | -5,252        | -3,643 |
| 5 vs 1                 | -6,171           | 413       | ***      | -6,981        | -5,360 |
| HCC Score              |                  |           |          |               |        |
| 1 vs 0                 | 2,302            | 273       | ***      | 1,768         | 2,837  |
| 2 vs 0                 | 5,129            | 432       | ***      | 4,283         | 5,976  |
| 3+ vs 0                | 13,102           | 707       | ***      | 11,717        | 14,488 |
| Married                |                  |           |          |               |        |
| Yes vs No              | -1,128           | 245       | ***      | -1,608        | -647   |
| Treatment              |                  |           |          |               |        |
| No surgery vs          |                  |           |          |               |        |
| Surgery + radiation    | -207             | 248       | NS       | -693          | 279    |
| Surgery, no radiation  |                  |           |          |               |        |
| vs Surgery + radiation | 2,232            | 865       | *        | 536           | 3,928  |
| Race                   |                  |           |          |               |        |
| Asian vs White         | -1,689           | 537       | **       | -2,741        | -637   |
| Black vs White         | 1,308            | 590       | *        | 151           | 2,465  |
| Hispanic vs White      | 1,350            | 569       | *        | 235           | 2,466  |
| Stage                  |                  |           |          |               |        |
| II vs I                | 1,461            | 255       | ***      | 960           | 1,961  |
| III vs I               | 3,724            | 481       | ***      | 2,781         | 4,666  |
| Age                    | 53               | 20        | **       | 15            | 91     |

Note: \*statistically significant at  $P < 0.05$  level, \*\* at  $P < 0.01$  level, \*\*\* at  $P < 0.001$  level; NS stands for not significant

*D-7. Medication Costs*

| <b>Variables</b>       | <b>Estimates</b> | <b>SE</b> | <b>P</b> | <b>95% CI</b> |        |
|------------------------|------------------|-----------|----------|---------------|--------|
| Adherent (Yes vs No)   | 2,302            | 63        | ***      | 2,179         | 2,426  |
| Year                   |                  |           |          |               |        |
| 2 vs 1                 | -960             | 88        | ***      | -1,133        | -786   |
| 3 vs 1                 | -1,900           | 93        | ***      | -2,082        | -1,718 |
| 4 vs 1                 | -2,909           | 94        | ***      | -3,093        | -2,724 |
| 5 vs 1                 | -3,592           | 97        | ***      | -3,783        | -3,402 |
| HCC Score              |                  |           |          |               |        |
| 1 vs 0                 | 1,413            | 80        | ***      | 1,257         | 1,569  |
| 2 vs 0                 | 2,376            | 127       | ***      | 2,128         | 2,624  |
| 3+ vs 0                | 4,211            | 192       | ***      | 3,835         | 4,588  |
| Married                |                  |           |          |               |        |
| Yes vs No              | -477             | 69        | ***      | -612          | -342   |
| Treatment              |                  |           |          |               |        |
| No surgery vs          |                  |           |          |               |        |
| Surgery + radiation    | 502              | 73        | ***      | 359           | 646    |
| Surgery, no radiation  |                  |           |          |               |        |
| vs Surgery + radiation | -100             | 206       | NS       | -503          | 303    |
| Race                   |                  |           |          |               |        |
| Asian vs White         | 1,514            | 190       | ***      | 1,142         | 1,886  |
| Black vs White         | 430              | 140       | **       | 156           | 704    |
| Hispanic vs White      | 299              | 124       | *        | 57            | 541    |
| Stage                  |                  |           |          |               |        |
| II vs I                | 304              | 77        | ***      | 154           | 454    |
| III vs I               | -64              | 112       | NS       | -283          | 155    |
| Age                    | -32              | 5         | ***      | -41           | -22    |

Note: \*statistically significant at  $P < 0.05$  level, \*\* at  $P < 0.01$  level, \*\*\* at  $P < 0.001$  level; NS stands for not significant
